# Supplementary material for: Relative Reproduction Number of SARS-CoV-2 Omicron (B.1.1.529) Compared with Delta Variant in South Africa
Source: MDPI journal article supplement (doi:10.3390/jcm11010030), 2021-12-23
Supplement: s1 [file jcm-1527228-supplementary.xlsx]

## Sheet: jcm-1527228
gisaid_epi_isl	date	pangolin_lineage	originating_lab	submitting_lab	date_submitted
EPI_ISL_5098684	2021-09-17	AY.45	NHLS Charlotte Maxeke Johannesburg Hospital	CERI, Centre for Epidemic Response and Innvoation, Stellenbosch University and KRISP, KZN Research Innovation and Sequencing Platform, UKZN.	2021-10-13
EPI_ISL_5098706	2021-09-17	AY.45	NHLS Charlotte Maxeke Johannesburg Hospital	CERI, Centre for Epidemic Response and Innvoation, Stellenbosch University and KRISP, KZN Research Innovation and Sequencing Platform, UKZN.	2021-10-13
EPI_ISL_5098743	2021-09-17	AY.122	NHLS Charlotte Maxeke Johannesburg Hospital	CERI, Centre for Epidemic Response and Innvoation, Stellenbosch University and KRISP, KZN Research Innovation and Sequencing Platform, UKZN.	2021-10-13
EPI_ISL_5098751	2021-09-16	AY.45	NHLS Charlotte Maxeke Johannesburg Hospital	CERI, Centre for Epidemic Response and Innvoation, Stellenbosch University and KRISP, KZN Research Innovation and Sequencing Platform, UKZN.	2021-10-13
EPI_ISL_5098812	2021-09-17	C.1.2	NHLS Charlotte Maxeke Johannesburg Hospital	CERI, Centre for Epidemic Response and Innvoation, Stellenbosch University and KRISP, KZN Research Innovation and Sequencing Platform, UKZN.	2021-10-13
EPI_ISL_5098820	2021-09-16	AY.116	NHLS Charlotte Maxeke Johannesburg Hospital	CERI, Centre for Epidemic Response and Innvoation, Stellenbosch University and KRISP, KZN Research Innovation and Sequencing Platform, UKZN.	2021-10-13
EPI_ISL_5098857	2021-09-16	AY.45	NHLS Charlotte Maxeke Johannesburg Hospital	CERI, Centre for Epidemic Response and Innvoation, Stellenbosch University and KRISP, KZN Research Innovation and Sequencing Platform, UKZN.	2021-10-13
EPI_ISL_5098890	2021-09-17	None	NHLS Charlotte Maxeke Johannesburg Hospital	CERI, Centre for Epidemic Response and Innvoation, Stellenbosch University and KRISP, KZN Research Innovation and Sequencing Platform, UKZN.	2021-10-13
EPI_ISL_5098993	2021-09-17	AY.38	NHLS Charlotte Maxeke Johannesburg Hospital	CERI, Centre for Epidemic Response and Innvoation, Stellenbosch University and KRISP, KZN Research Innovation and Sequencing Platform, UKZN.	2021-10-13
EPI_ISL_5099047	2021-09-17	AY.38	NHLS Charlotte Maxeke Johannesburg Hospital	CERI, Centre for Epidemic Response and Innvoation, Stellenbosch University and KRISP, KZN Research Innovation and Sequencing Platform, UKZN.	2021-10-13
EPI_ISL_5099085	2021-09-17	AY.45	NHLS Charlotte Maxeke Johannesburg Hospital	CERI, Centre for Epidemic Response and Innvoation, Stellenbosch University and KRISP, KZN Research Innovation and Sequencing Platform, UKZN.	2021-10-13
EPI_ISL_5429023	2021-09-25	AY.45	NHLS Charlotte Maxeke Johannesburg Hospital	CERI, Centre for Epidemic Response and Innvoation, Stellenbosch University and KRISP, KZN Research Innovation and Sequencing Platform, UKZN.	2021-10-22
EPI_ISL_5429024	2021-09-20	AY.45	NHLS Charlotte Maxeke Johannesburg Hospital	CERI, Centre for Epidemic Response and Innvoation, Stellenbosch University and KRISP, KZN Research Innovation and Sequencing Platform, UKZN.	2021-10-22
EPI_ISL_5429025	2021-09-20	AY.45	NHLS Charlotte Maxeke Johannesburg Hospital	CERI, Centre for Epidemic Response and Innvoation, Stellenbosch University and KRISP, KZN Research Innovation and Sequencing Platform, UKZN.	2021-10-22
EPI_ISL_5429026	2021-09-21	None	NHLS Charlotte Maxeke Johannesburg Hospital	CERI, Centre for Epidemic Response and Innvoation, Stellenbosch University and KRISP, KZN Research Innovation and Sequencing Platform, UKZN.	2021-10-22
EPI_ISL_5429027	2021-09-23	AY.45	NHLS Charlotte Maxeke Johannesburg Hospital	CERI, Centre for Epidemic Response and Innvoation, Stellenbosch University and KRISP, KZN Research Innovation and Sequencing Platform, UKZN.	2021-10-22
EPI_ISL_5429034	2021-09-20	AY.45	NHLS Charlotte Maxeke Johannesburg Hospital	CERI, Centre for Epidemic Response and Innvoation, Stellenbosch University and KRISP, KZN Research Innovation and Sequencing Platform, UKZN.	2021-10-22
EPI_ISL_5429035	2021-09-20	AY.45	NHLS Charlotte Maxeke Johannesburg Hospital	CERI, Centre for Epidemic Response and Innvoation, Stellenbosch University and KRISP, KZN Research Innovation and Sequencing Platform, UKZN.	2021-10-22
EPI_ISL_5429036	2021-09-20	AY.45	NHLS Charlotte Maxeke Johannesburg Hospital	CERI, Centre for Epidemic Response and Innvoation, Stellenbosch University and KRISP, KZN Research Innovation and Sequencing Platform, UKZN.	2021-10-22
EPI_ISL_5429038	2021-09-20	AY.45	NHLS Charlotte Maxeke Johannesburg Hospital	CERI, Centre for Epidemic Response and Innvoation, Stellenbosch University and KRISP, KZN Research Innovation and Sequencing Platform, UKZN.	2021-10-22
EPI_ISL_5429039	2021-09-21	AY.45	NHLS Charlotte Maxeke Johannesburg Hospital	CERI, Centre for Epidemic Response and Innvoation, Stellenbosch University and KRISP, KZN Research Innovation and Sequencing Platform, UKZN.	2021-10-22
EPI_ISL_5429040	2021-09-20	AY.45	NHLS Charlotte Maxeke Johannesburg Hospital	CERI, Centre for Epidemic Response and Innvoation, Stellenbosch University and KRISP, KZN Research Innovation and Sequencing Platform, UKZN.	2021-10-22
EPI_ISL_5429041	2021-09-20	AY.45	NHLS Charlotte Maxeke Johannesburg Hospital	CERI, Centre for Epidemic Response and Innvoation, Stellenbosch University and KRISP, KZN Research Innovation and Sequencing Platform, UKZN.	2021-10-22
EPI_ISL_5429042	2021-09-20	AY.45	NHLS Charlotte Maxeke Johannesburg Hospital	CERI, Centre for Epidemic Response and Innvoation, Stellenbosch University and KRISP, KZN Research Innovation and Sequencing Platform, UKZN.	2021-10-22
EPI_ISL_5429043	2021-09-20	AY.45	NHLS Charlotte Maxeke Johannesburg Hospital	CERI, Centre for Epidemic Response and Innvoation, Stellenbosch University and KRISP, KZN Research Innovation and Sequencing Platform, UKZN.	2021-10-22
EPI_ISL_5429044	2021-09-21	AY.33	NHLS Charlotte Maxeke Johannesburg Hospital	CERI, Centre for Epidemic Response and Innvoation, Stellenbosch University and KRISP, KZN Research Innovation and Sequencing Platform, UKZN.	2021-10-22
EPI_ISL_5429045	2021-09-21	AY.45	NHLS Charlotte Maxeke Johannesburg Hospital	CERI, Centre for Epidemic Response and Innvoation, Stellenbosch University and KRISP, KZN Research Innovation and Sequencing Platform, UKZN.	2021-10-22
EPI_ISL_5429049	2021-09-20	B.1	NHLS Charlotte Maxeke Johannesburg Hospital	CERI, Centre for Epidemic Response and Innvoation, Stellenbosch University and KRISP, KZN Research Innovation and Sequencing Platform, UKZN.	2021-10-22
EPI_ISL_5477158	2021-09-23	AY.45	National Institute for Communicable Diseases of the National Health Laboratory Service	National Institute for Communicable Diseases of the National Health Laboratory Service	2021-10-25
EPI_ISL_5477595	2021-09-21	AY.45	National Institute for Communicable Diseases of the National Health Laboratory Service	National Institute for Communicable Diseases of the National Health Laboratory Service	2021-10-25
EPI_ISL_5477673	2021-09-23	B.1	National Institute for Communicable Diseases of the National Health Laboratory Service	National Institute for Communicable Diseases of the National Health Laboratory Service	2021-10-25
EPI_ISL_5917851	2021-09-19	AY.45	Helen Joseph Laboratory	National Institute for Communicable Diseases of the National Health Laboratory Service	2021-11-04
EPI_ISL_5917869	2021-10-05	AY.42	Helen Joseph Laboratory	National Institute for Communicable Diseases of the National Health Laboratory Service	2021-11-04
EPI_ISL_5917880	2021-09-23	AY.45	Helen Joseph Laboratory	National Institute for Communicable Diseases of the National Health Laboratory Service	2021-11-04
EPI_ISL_5917886	2021-09-23	C.1.2	Helen Joseph Laboratory	National Institute for Communicable Diseases of the National Health Laboratory Service	2021-11-04
EPI_ISL_5917889	2021-09-16	AY.99	Ampath	National Institute for Communicable Diseases of the National Health Laboratory Service	2021-11-04
EPI_ISL_5917956	2021-09-21	AY.45	Helen Joseph Laboratory	National Institute for Communicable Diseases of the National Health Laboratory Service	2021-11-04
EPI_ISL_5917984	2021-09-28	AY.45	Ampath	National Institute for Communicable Diseases of the National Health Laboratory Service	2021-11-04
EPI_ISL_5918006	2021-09-16	None	Helen Joseph Laboratory	National Institute for Communicable Diseases of the National Health Laboratory Service	2021-11-04
EPI_ISL_5918018	2021-09-17	None	Helen Joseph Laboratory	National Institute for Communicable Diseases of the National Health Laboratory Service	2021-11-04
EPI_ISL_5918025	2021-09-17	AY.45	Helen Joseph Laboratory	National Institute for Communicable Diseases of the National Health Laboratory Service	2021-11-04
EPI_ISL_5918032	2021-09-30	AY.45	Ampath	National Institute for Communicable Diseases of the National Health Laboratory Service	2021-11-04
EPI_ISL_5918034	2021-10-01	AY.45	Helen Joseph Laboratory	National Institute for Communicable Diseases of the National Health Laboratory Service	2021-11-04
EPI_ISL_5918035	2021-09-20	AY.45	Pathcare	National Institute for Communicable Diseases of the National Health Laboratory Service	2021-11-04
EPI_ISL_5918041	2021-09-30	AY.45	Ampath	National Institute for Communicable Diseases of the National Health Laboratory Service	2021-11-04
EPI_ISL_5918047	2021-09-26	AY.43	Ampath	National Institute for Communicable Diseases of the National Health Laboratory Service	2021-11-04
EPI_ISL_5918065	2021-09-21	AY.45	Helen Joseph Laboratory	National Institute for Communicable Diseases of the National Health Laboratory Service	2021-11-04
EPI_ISL_5918074	2021-09-16	AY.38	Ampath	National Institute for Communicable Diseases of the National Health Laboratory Service	2021-11-04
EPI_ISL_5918090	2021-09-17	AY.45	Ampath	National Institute for Communicable Diseases of the National Health Laboratory Service	2021-11-04
EPI_ISL_5918092	2021-09-30	None	Ampath	National Institute for Communicable Diseases of the National Health Laboratory Service	2021-11-04
EPI_ISL_5918093	2021-10-01	C.1.2	Helen Joseph Laboratory	National Institute for Communicable Diseases of the National Health Laboratory Service	2021-11-04
EPI_ISL_5918101	2021-09-26	AY.45	Ampath	National Institute for Communicable Diseases of the National Health Laboratory Service	2021-11-04
EPI_ISL_5918155	2021-09-17	AY.45	Helen Joseph Laboratory	National Institute for Communicable Diseases of the National Health Laboratory Service	2021-11-04
EPI_ISL_5918156	2021-09-17	AY.45	Helen Joseph Laboratory	National Institute for Communicable Diseases of the National Health Laboratory Service	2021-11-04
EPI_ISL_5918157	2021-09-17	AY.46	Helen Joseph Laboratory	National Institute for Communicable Diseases of the National Health Laboratory Service	2021-11-04
EPI_ISL_5918158	2021-09-21	AY.6	Helen Joseph Laboratory	National Institute for Communicable Diseases of the National Health Laboratory Service	2021-11-04
EPI_ISL_5920016	2021-09-16	AY.32	Ampath	National Institute for Communicable Diseases of the National Health Laboratory Service	2021-11-04
EPI_ISL_5920102	2021-09-19	AY.45	Ampath	National Institute for Communicable Diseases of the National Health Laboratory Service	2021-11-04
EPI_ISL_5920133	2021-09-19	AY.45	Ampath	National Institute for Communicable Diseases of the National Health Laboratory Service	2021-11-04
EPI_ISL_5920137	2021-09-19	AY.45	Ampath	National Institute for Communicable Diseases of the National Health Laboratory Service	2021-11-04
EPI_ISL_5920155	2021-09-25	AY.45	Ampath	National Institute for Communicable Diseases of the National Health Laboratory Service	2021-11-04
EPI_ISL_5920159	2021-09-25	AY.91	Ampath	National Institute for Communicable Diseases of the National Health Laboratory Service	2021-11-04
EPI_ISL_5920164	2021-09-25	AY.91	Ampath	National Institute for Communicable Diseases of the National Health Laboratory Service	2021-11-04
EPI_ISL_5920170	2021-09-25	AY.45	Ampath	National Institute for Communicable Diseases of the National Health Laboratory Service	2021-11-04
EPI_ISL_5920196	2021-09-30	AY.45	Ampath	National Institute for Communicable Diseases of the National Health Laboratory Service	2021-11-04
EPI_ISL_5920204	2021-09-28	AY.45	Ampath	National Institute for Communicable Diseases of the National Health Laboratory Service	2021-11-04
EPI_ISL_5920214	2021-09-28	AY.45	Ampath	National Institute for Communicable Diseases of the National Health Laboratory Service	2021-11-04
EPI_ISL_6204411	2021-09-30	AY.99	National Institute for Communicable Diseases of the National Health Laboratory Service	National Institute for Communicable Diseases of the National Health Laboratory Service	2021-11-11
EPI_ISL_6308308	2021-09-29	None	University of Pretoria	CERI, Centre for Epidemic Response and Innvoation, Stellenbosch University and KRISP, KZN Research Innovation and Sequencing Platform, UKZN.	2021-11-15
EPI_ISL_6308309	2021-09-29	AY.45	University of Pretoria	CERI, Centre for Epidemic Response and Innvoation, Stellenbosch University and KRISP, KZN Research Innovation and Sequencing Platform, UKZN.	2021-11-15
EPI_ISL_6308310	2021-09-29	AY.38	University of Pretoria	CERI, Centre for Epidemic Response and Innvoation, Stellenbosch University and KRISP, KZN Research Innovation and Sequencing Platform, UKZN.	2021-11-15
EPI_ISL_6308311	2021-09-29	AY.45	University of Pretoria	CERI, Centre for Epidemic Response and Innvoation, Stellenbosch University and KRISP, KZN Research Innovation and Sequencing Platform, UKZN.	2021-11-15
EPI_ISL_6308315	2021-09-27	C.1.2	University of Pretoria	CERI, Centre for Epidemic Response and Innvoation, Stellenbosch University and KRISP, KZN Research Innovation and Sequencing Platform, UKZN.	2021-11-15
EPI_ISL_6308316	2021-09-21	AY.45	University of Pretoria	CERI, Centre for Epidemic Response and Innvoation, Stellenbosch University and KRISP, KZN Research Innovation and Sequencing Platform, UKZN.	2021-11-15
EPI_ISL_6308320	2021-09-29	AY.45	University of Pretoria	CERI, Centre for Epidemic Response and Innvoation, Stellenbosch University and KRISP, KZN Research Innovation and Sequencing Platform, UKZN.	2021-11-15
EPI_ISL_6308327	2021-09-28	AY.43	University of Pretoria	CERI, Centre for Epidemic Response and Innvoation, Stellenbosch University and KRISP, KZN Research Innovation and Sequencing Platform, UKZN.	2021-11-15
EPI_ISL_6308336	2021-09-22	AY.45	University of Pretoria	CERI, Centre for Epidemic Response and Innvoation, Stellenbosch University and KRISP, KZN Research Innovation and Sequencing Platform, UKZN.	2021-11-15
EPI_ISL_6308340	2021-09-22	AY.45	University of Pretoria	CERI, Centre for Epidemic Response and Innvoation, Stellenbosch University and KRISP, KZN Research Innovation and Sequencing Platform, UKZN.	2021-11-15
EPI_ISL_6308341	2021-09-20	AY.46	University of Pretoria	CERI, Centre for Epidemic Response and Innvoation, Stellenbosch University and KRISP, KZN Research Innovation and Sequencing Platform, UKZN.	2021-11-15
EPI_ISL_6308351	2021-09-26	AY.45	University of Pretoria	CERI, Centre for Epidemic Response and Innvoation, Stellenbosch University and KRISP, KZN Research Innovation and Sequencing Platform, UKZN.	2021-11-15
EPI_ISL_6308356	2021-09-20	None	University of Pretoria	CERI, Centre for Epidemic Response and Innvoation, Stellenbosch University and KRISP, KZN Research Innovation and Sequencing Platform, UKZN.	2021-11-15
EPI_ISL_6327838	2021-10-28	AY.29.1	CHRIS HANI BARAGWANATH LABORATORY	National Institute for Communicable Diseases of the National Health Laboratory Service	2021-11-16
EPI_ISL_6327839	2021-10-18	AY.116	CHRIS HANI BARAGWANATH LABORATORY	National Institute for Communicable Diseases of the National Health Laboratory Service	2021-11-16
EPI_ISL_6327847	2021-10-21	AY.45	CHRIS HANI BARAGWANATH LABORATORY	National Institute for Communicable Diseases of the National Health Laboratory Service	2021-11-16
EPI_ISL_6327925	2021-10-21	AY.122	CHRIS HANI BARAGWANATH LABORATORY	National Institute for Communicable Diseases of the National Health Laboratory Service	2021-11-16
EPI_ISL_6327947	2021-10-27	AY.116	CHRIS HANI BARAGWANATH LABORATORY	National Institute for Communicable Diseases of the National Health Laboratory Service	2021-11-16
EPI_ISL_6327973	2021-10-28	AY.45	CHRIS HANI BARAGWANATH LABORATORY	National Institute for Communicable Diseases of the National Health Laboratory Service	2021-11-16
EPI_ISL_6422264	2021-10-10	AY.45	NHLS Charlotte Maxeke Johannesburg Hospital	CERI, Centre for Epidemic Response and Innvoation, Stellenbosch University and KRISP, KZN Research Innovation and Sequencing Platform, UKZN.	2021-11-18
EPI_ISL_6422265	2021-10-06	C.1.2	NHLS Charlotte Maxeke Johannesburg Hospital	CERI, Centre for Epidemic Response and Innvoation, Stellenbosch University and KRISP, KZN Research Innovation and Sequencing Platform, UKZN.	2021-11-18
EPI_ISL_6422266	2021-10-07	AY.45	NHLS Charlotte Maxeke Johannesburg Hospital	CERI, Centre for Epidemic Response and Innvoation, Stellenbosch University and KRISP, KZN Research Innovation and Sequencing Platform, UKZN.	2021-11-18
EPI_ISL_6422267	2021-10-06	AY.45	NHLS Charlotte Maxeke Johannesburg Hospital	CERI, Centre for Epidemic Response and Innvoation, Stellenbosch University and KRISP, KZN Research Innovation and Sequencing Platform, UKZN.	2021-11-18
EPI_ISL_6422268	2021-10-07	AY.45	NHLS Charlotte Maxeke Johannesburg Hospital	CERI, Centre for Epidemic Response and Innvoation, Stellenbosch University and KRISP, KZN Research Innovation and Sequencing Platform, UKZN.	2021-11-18
EPI_ISL_6422269	2021-10-06	AY.116	NHLS Charlotte Maxeke Johannesburg Hospital	CERI, Centre for Epidemic Response and Innvoation, Stellenbosch University and KRISP, KZN Research Innovation and Sequencing Platform, UKZN.	2021-11-18
EPI_ISL_6422305	2021-10-12	C.1.2	NHLS Charlotte Maxeke Johannesburg Hospital	CERI, Centre for Epidemic Response and Innvoation, Stellenbosch University and KRISP, KZN Research Innovation and Sequencing Platform, UKZN.	2021-11-18
EPI_ISL_6422306	2021-10-13	AY.45	NHLS Charlotte Maxeke Johannesburg Hospital	CERI, Centre for Epidemic Response and Innvoation, Stellenbosch University and KRISP, KZN Research Innovation and Sequencing Platform, UKZN.	2021-11-18
EPI_ISL_6422307	2021-10-11	AY.32	NHLS Charlotte Maxeke Johannesburg Hospital	CERI, Centre for Epidemic Response and Innvoation, Stellenbosch University and KRISP, KZN Research Innovation and Sequencing Platform, UKZN.	2021-11-18
EPI_ISL_6422308	2021-10-12	AY.45	NHLS Charlotte Maxeke Johannesburg Hospital	CERI, Centre for Epidemic Response and Innvoation, Stellenbosch University and KRISP, KZN Research Innovation and Sequencing Platform, UKZN.	2021-11-18
EPI_ISL_6422309	2021-10-12	AY.45	NHLS Charlotte Maxeke Johannesburg Hospital	CERI, Centre for Epidemic Response and Innvoation, Stellenbosch University and KRISP, KZN Research Innovation and Sequencing Platform, UKZN.	2021-11-18
EPI_ISL_6422310	2021-10-12	None	NHLS Charlotte Maxeke Johannesburg Hospital	CERI, Centre for Epidemic Response and Innvoation, Stellenbosch University and KRISP, KZN Research Innovation and Sequencing Platform, UKZN.	2021-11-18
EPI_ISL_6422311	2021-10-13	AY.99	NHLS Charlotte Maxeke Johannesburg Hospital	CERI, Centre for Epidemic Response and Innvoation, Stellenbosch University and KRISP, KZN Research Innovation and Sequencing Platform, UKZN.	2021-11-18
EPI_ISL_6422312	2021-10-11	AY.45	NHLS Charlotte Maxeke Johannesburg Hospital	CERI, Centre for Epidemic Response and Innvoation, Stellenbosch University and KRISP, KZN Research Innovation and Sequencing Platform, UKZN.	2021-11-18
EPI_ISL_6422313	2021-10-15	AY.45	NHLS Charlotte Maxeke Johannesburg Hospital	CERI, Centre for Epidemic Response and Innvoation, Stellenbosch University and KRISP, KZN Research Innovation and Sequencing Platform, UKZN.	2021-11-18
EPI_ISL_6422314	2021-10-13	AY.45	NHLS Charlotte Maxeke Johannesburg Hospital	CERI, Centre for Epidemic Response and Innvoation, Stellenbosch University and KRISP, KZN Research Innovation and Sequencing Platform, UKZN.	2021-11-18
EPI_ISL_6422315	2021-10-11	None	NHLS Charlotte Maxeke Johannesburg Hospital	CERI, Centre for Epidemic Response and Innvoation, Stellenbosch University and KRISP, KZN Research Innovation and Sequencing Platform, UKZN.	2021-11-18
EPI_ISL_6422316	2021-10-11	AY.45	NHLS Charlotte Maxeke Johannesburg Hospital	CERI, Centre for Epidemic Response and Innvoation, Stellenbosch University and KRISP, KZN Research Innovation and Sequencing Platform, UKZN.	2021-11-18
EPI_ISL_6422317	2021-10-11	AY.45	NHLS Charlotte Maxeke Johannesburg Hospital	CERI, Centre for Epidemic Response and Innvoation, Stellenbosch University and KRISP, KZN Research Innovation and Sequencing Platform, UKZN.	2021-11-18
EPI_ISL_6422318	2021-10-13	AY.45	NHLS Charlotte Maxeke Johannesburg Hospital	CERI, Centre for Epidemic Response and Innvoation, Stellenbosch University and KRISP, KZN Research Innovation and Sequencing Platform, UKZN.	2021-11-18
EPI_ISL_6647956	2021-11-14	BA.1	LANCET LABORATORY	National Institute for Communicable Diseases of the National Health Laboratory Service	2021-11-23
EPI_ISL_6647957	2021-11-15	BA.1	LANCET LABORATORY	National Institute for Communicable Diseases of the National Health Laboratory Service	2021-11-23
EPI_ISL_6647958	2021-11-16	BA.1	LANCET LABORATORY	National Institute for Communicable Diseases of the National Health Laboratory Service	2021-11-23
EPI_ISL_6647959	2021-11-16	BA.1	LANCET LABORATORY	National Institute for Communicable Diseases of the National Health Laboratory Service	2021-11-23
EPI_ISL_6647960	2021-11-15	BA.1	LANCET LABORATORY	National Institute for Communicable Diseases of the National Health Laboratory Service	2021-11-23
EPI_ISL_6647961	2021-11-15	BA.1	LANCET LABORATORY	National Institute for Communicable Diseases of the National Health Laboratory Service	2021-11-23
EPI_ISL_6647962	2021-11-16	BA.1	LANCET LABORATORY	National Institute for Communicable Diseases of the National Health Laboratory Service	2021-11-23
EPI_ISL_6698792	2021-11-15	BA.1	LANCET LABORATORY	National Institute for Communicable Diseases of the National Health Laboratory Service	2021-11-25
EPI_ISL_6699728	2021-11-17	BA.1	National Health Laboratory Services, Virology, Charlotte Maxeke Johannesburg hospital, Parktown, Johannesburg, Gauteng	CERI, Centre for Epidemic Response and Innvoation, Stellenbosch University and KRISP, KZN Research Innovation and Sequencing Platform, UKZN.	2021-11-25
EPI_ISL_6699729	2021-11-17	BA.1	National Health Laboratory Services, Virology, Charlotte Maxeke Johannesburg hospital, Parktown, Johannesburg, Gauteng	CERI, Centre for Epidemic Response and Innvoation, Stellenbosch University and KRISP, KZN Research Innovation and Sequencing Platform, UKZN.	2021-11-25
EPI_ISL_6699730	2021-11-17	BA.1	National Health Laboratory Services, Virology, Charlotte Maxeke Johannesburg hospital, Parktown, Johannesburg, Gauteng	CERI, Centre for Epidemic Response and Innvoation, Stellenbosch University and KRISP, KZN Research Innovation and Sequencing Platform, UKZN.	2021-11-25
EPI_ISL_6699731	2021-11-16	BA.1	National Health Laboratory Services, Virology, Charlotte Maxeke Johannesburg hospital, Parktown, Johannesburg, Gauteng	CERI, Centre for Epidemic Response and Innvoation, Stellenbosch University and KRISP, KZN Research Innovation and Sequencing Platform, UKZN.	2021-11-25
EPI_ISL_6699732	2021-11-15	BA.1	National Health Laboratory Services, Virology, Charlotte Maxeke Johannesburg hospital, Parktown, Johannesburg, Gauteng	CERI, Centre for Epidemic Response and Innvoation, Stellenbosch University and KRISP, KZN Research Innovation and Sequencing Platform, UKZN.	2021-11-25
EPI_ISL_6699733	2021-11-15	BA.1	National Health Laboratory Services, Virology, Charlotte Maxeke Johannesburg hospital, Parktown, Johannesburg, Gauteng	CERI, Centre for Epidemic Response and Innvoation, Stellenbosch University and KRISP, KZN Research Innovation and Sequencing Platform, UKZN.	2021-11-25
EPI_ISL_6699734	2021-11-14	BA.1	National Health Laboratory Services, Virology, Charlotte Maxeke Johannesburg hospital, Parktown, Johannesburg, Gauteng	CERI, Centre for Epidemic Response and Innvoation, Stellenbosch University and KRISP, KZN Research Innovation and Sequencing Platform, UKZN.	2021-11-25
EPI_ISL_6699735	2021-11-15	BA.1	National Health Laboratory Services, Virology, Charlotte Maxeke Johannesburg hospital, Parktown, Johannesburg, Gauteng	CERI, Centre for Epidemic Response and Innvoation, Stellenbosch University and KRISP, KZN Research Innovation and Sequencing Platform, UKZN.	2021-11-25
EPI_ISL_6699736	2021-11-16	BA.1	National Health Laboratory Services, Virology, Charlotte Maxeke Johannesburg hospital, Parktown, Johannesburg, Gauteng	CERI, Centre for Epidemic Response and Innvoation, Stellenbosch University and KRISP, KZN Research Innovation and Sequencing Platform, UKZN.	2021-11-25
EPI_ISL_6699737	2021-11-16	BA.1	National Health Laboratory Services, Virology, Charlotte Maxeke Johannesburg hospital, Parktown, Johannesburg, Gauteng	CERI, Centre for Epidemic Response and Innvoation, Stellenbosch University and KRISP, KZN Research Innovation and Sequencing Platform, UKZN.	2021-11-25
EPI_ISL_6699738	2021-11-17	BA.1	National Health Laboratory Services, Virology, Charlotte Maxeke Johannesburg hospital, Parktown, Johannesburg, Gauteng	CERI, Centre for Epidemic Response and Innvoation, Stellenbosch University and KRISP, KZN Research Innovation and Sequencing Platform, UKZN.	2021-11-25
EPI_ISL_6699739	2021-11-18	BA.1	National Health Laboratory Services, Virology, Charlotte Maxeke Johannesburg hospital, Parktown, Johannesburg, Gauteng	CERI, Centre for Epidemic Response and Innvoation, Stellenbosch University and KRISP, KZN Research Innovation and Sequencing Platform, UKZN.	2021-11-25
EPI_ISL_6699740	2021-11-18	BA.1	National Health Laboratory Services, Virology, Charlotte Maxeke Johannesburg hospital, Parktown, Johannesburg, Gauteng	CERI, Centre for Epidemic Response and Innvoation, Stellenbosch University and KRISP, KZN Research Innovation and Sequencing Platform, UKZN.	2021-11-25
EPI_ISL_6699741	2021-11-18	BA.1	National Health Laboratory Services, Virology, Charlotte Maxeke Johannesburg hospital, Parktown, Johannesburg, Gauteng	CERI, Centre for Epidemic Response and Innvoation, Stellenbosch University and KRISP, KZN Research Innovation and Sequencing Platform, UKZN.	2021-11-25
EPI_ISL_6699742	2021-11-18	BA.1	National Health Laboratory Services, Virology, Charlotte Maxeke Johannesburg hospital, Parktown, Johannesburg, Gauteng	CERI, Centre for Epidemic Response and Innvoation, Stellenbosch University and KRISP, KZN Research Innovation and Sequencing Platform, UKZN.	2021-11-25
EPI_ISL_6699743	2021-11-18	BA.1	National Health Laboratory Services, Virology, Charlotte Maxeke Johannesburg hospital, Parktown, Johannesburg, Gauteng	CERI, Centre for Epidemic Response and Innvoation, Stellenbosch University and KRISP, KZN Research Innovation and Sequencing Platform, UKZN.	2021-11-25
EPI_ISL_6699744	2021-11-17	BA.1	National Health Laboratory Services, Virology, Charlotte Maxeke Johannesburg hospital, Parktown, Johannesburg, Gauteng	CERI, Centre for Epidemic Response and Innvoation, Stellenbosch University and KRISP, KZN Research Innovation and Sequencing Platform, UKZN.	2021-11-25
EPI_ISL_6699745	2021-11-19	BA.1	National Health Laboratory Services, Virology, Charlotte Maxeke Johannesburg hospital, Parktown, Johannesburg, Gauteng	CERI, Centre for Epidemic Response and Innvoation, Stellenbosch University and KRISP, KZN Research Innovation and Sequencing Platform, UKZN.	2021-11-25
EPI_ISL_6699746	2021-11-17	BA.1	National Health Laboratory Services, Virology, Charlotte Maxeke Johannesburg hospital, Parktown, Johannesburg, Gauteng	CERI, Centre for Epidemic Response and Innvoation, Stellenbosch University and KRISP, KZN Research Innovation and Sequencing Platform, UKZN.	2021-11-25
EPI_ISL_6699747	2021-11-19	BA.1	National Health Laboratory Services, Virology, Charlotte Maxeke Johannesburg hospital, Parktown, Johannesburg, Gauteng	CERI, Centre for Epidemic Response and Innvoation, Stellenbosch University and KRISP, KZN Research Innovation and Sequencing Platform, UKZN.	2021-11-25
EPI_ISL_6699748	2021-11-19	BA.1	National Health Laboratory Services, Virology, Charlotte Maxeke Johannesburg hospital, Parktown, Johannesburg, Gauteng	CERI, Centre for Epidemic Response and Innvoation, Stellenbosch University and KRISP, KZN Research Innovation and Sequencing Platform, UKZN.	2021-11-25
EPI_ISL_6699749	2021-11-19	BA.1	National Health Laboratory Services, Virology, Charlotte Maxeke Johannesburg hospital, Parktown, Johannesburg, Gauteng	CERI, Centre for Epidemic Response and Innvoation, Stellenbosch University and KRISP, KZN Research Innovation and Sequencing Platform, UKZN.	2021-11-25
EPI_ISL_6699750	2021-11-19	BA.1	National Health Laboratory Services, Virology, Charlotte Maxeke Johannesburg hospital, Parktown, Johannesburg, Gauteng	CERI, Centre for Epidemic Response and Innvoation, Stellenbosch University and KRISP, KZN Research Innovation and Sequencing Platform, UKZN.	2021-11-25
EPI_ISL_6699751	2021-11-19	BA.1	National Health Laboratory Services, Virology, Charlotte Maxeke Johannesburg hospital, Parktown, Johannesburg, Gauteng	CERI, Centre for Epidemic Response and Innvoation, Stellenbosch University and KRISP, KZN Research Innovation and Sequencing Platform, UKZN.	2021-11-25
EPI_ISL_6699752	2021-11-19	BA.1	National Health Laboratory Services, Virology, Charlotte Maxeke Johannesburg hospital, Parktown, Johannesburg, Gauteng	CERI, Centre for Epidemic Response and Innvoation, Stellenbosch University and KRISP, KZN Research Innovation and Sequencing Platform, UKZN.	2021-11-25
EPI_ISL_6699753	2021-11-19	BA.1	National Health Laboratory Services, Virology, Charlotte Maxeke Johannesburg hospital, Parktown, Johannesburg, Gauteng	CERI, Centre for Epidemic Response and Innvoation, Stellenbosch University and KRISP, KZN Research Innovation and Sequencing Platform, UKZN.	2021-11-25
EPI_ISL_6699754	2021-11-19	BA.1	National Health Laboratory Services, Virology, Charlotte Maxeke Johannesburg hospital, Parktown, Johannesburg, Gauteng	CERI, Centre for Epidemic Response and Innvoation, Stellenbosch University and KRISP, KZN Research Innovation and Sequencing Platform, UKZN.	2021-11-25
EPI_ISL_6699755	2021-11-22	BA.1	National Health Laboratory Services, Virology, Charlotte Maxeke Johannesburg hospital, Parktown, Johannesburg, Gauteng	CERI, Centre for Epidemic Response and Innvoation, Stellenbosch University and KRISP, KZN Research Innovation and Sequencing Platform, UKZN.	2021-11-25
EPI_ISL_6699756	2021-11-22	BA.1	National Health Laboratory Services, Virology, Charlotte Maxeke Johannesburg hospital, Parktown, Johannesburg, Gauteng	CERI, Centre for Epidemic Response and Innvoation, Stellenbosch University and KRISP, KZN Research Innovation and Sequencing Platform, UKZN.	2021-11-25
EPI_ISL_6699757	2021-11-22	BA.1	National Health Laboratory Services, Virology, Charlotte Maxeke Johannesburg hospital, Parktown, Johannesburg, Gauteng	CERI, Centre for Epidemic Response and Innvoation, Stellenbosch University and KRISP, KZN Research Innovation and Sequencing Platform, UKZN.	2021-11-25
EPI_ISL_6699758	2021-11-21	BA.1	National Health Laboratory Services, Virology, Charlotte Maxeke Johannesburg hospital, Parktown, Johannesburg, Gauteng	CERI, Centre for Epidemic Response and Innvoation, Stellenbosch University and KRISP, KZN Research Innovation and Sequencing Platform, UKZN.	2021-11-25
EPI_ISL_6699759	2021-11-22	BA.1	National Health Laboratory Services, Virology, Charlotte Maxeke Johannesburg hospital, Parktown, Johannesburg, Gauteng	CERI, Centre for Epidemic Response and Innvoation, Stellenbosch University and KRISP, KZN Research Innovation and Sequencing Platform, UKZN.	2021-11-25
EPI_ISL_6699760	2021-11-22	BA.1	National Health Laboratory Services, Virology, Charlotte Maxeke Johannesburg hospital, Parktown, Johannesburg, Gauteng	CERI, Centre for Epidemic Response and Innvoation, Stellenbosch University and KRISP, KZN Research Innovation and Sequencing Platform, UKZN.	2021-11-25
EPI_ISL_6699761	2021-11-20	BA.1	National Health Laboratory Services, Virology, Charlotte Maxeke Johannesburg hospital, Parktown, Johannesburg, Gauteng	CERI, Centre for Epidemic Response and Innvoation, Stellenbosch University and KRISP, KZN Research Innovation and Sequencing Platform, UKZN.	2021-11-25
EPI_ISL_6699762	2021-11-20	BA.1	National Health Laboratory Services, Virology, Charlotte Maxeke Johannesburg hospital, Parktown, Johannesburg, Gauteng	CERI, Centre for Epidemic Response and Innvoation, Stellenbosch University and KRISP, KZN Research Innovation and Sequencing Platform, UKZN.	2021-11-25
EPI_ISL_6699763	2021-11-20	BA.1	National Health Laboratory Services, Virology, Charlotte Maxeke Johannesburg hospital, Parktown, Johannesburg, Gauteng	CERI, Centre for Epidemic Response and Innvoation, Stellenbosch University and KRISP, KZN Research Innovation and Sequencing Platform, UKZN.	2021-11-25
EPI_ISL_6699764	2021-11-20	BA.1	National Health Laboratory Services, Virology, Charlotte Maxeke Johannesburg hospital, Parktown, Johannesburg, Gauteng	CERI, Centre for Epidemic Response and Innvoation, Stellenbosch University and KRISP, KZN Research Innovation and Sequencing Platform, UKZN.	2021-11-25
EPI_ISL_6699765	2021-11-20	BA.1	National Health Laboratory Services, Virology, Charlotte Maxeke Johannesburg hospital, Parktown, Johannesburg, Gauteng	CERI, Centre for Epidemic Response and Innvoation, Stellenbosch University and KRISP, KZN Research Innovation and Sequencing Platform, UKZN.	2021-11-25
EPI_ISL_6699766	2021-11-19	BA.1	National Health Laboratory Services, Virology, Charlotte Maxeke Johannesburg hospital, Parktown, Johannesburg, Gauteng	CERI, Centre for Epidemic Response and Innvoation, Stellenbosch University and KRISP, KZN Research Innovation and Sequencing Platform, UKZN.	2021-11-25
EPI_ISL_6699767	2021-11-21	BA.1	National Health Laboratory Services, Virology, Charlotte Maxeke Johannesburg hospital, Parktown, Johannesburg, Gauteng	CERI, Centre for Epidemic Response and Innvoation, Stellenbosch University and KRISP, KZN Research Innovation and Sequencing Platform, UKZN.	2021-11-25
EPI_ISL_6699768	2021-11-22	BA.1	National Health Laboratory Services, Virology, Charlotte Maxeke Johannesburg hospital, Parktown, Johannesburg, Gauteng	CERI, Centre for Epidemic Response and Innvoation, Stellenbosch University and KRISP, KZN Research Innovation and Sequencing Platform, UKZN.	2021-11-25
EPI_ISL_6699769	2021-11-22	BA.1	National Health Laboratory Services, Virology, Charlotte Maxeke Johannesburg hospital, Parktown, Johannesburg, Gauteng	CERI, Centre for Epidemic Response and Innvoation, Stellenbosch University and KRISP, KZN Research Innovation and Sequencing Platform, UKZN.	2021-11-25
EPI_ISL_6699770	2021-11-22	BA.1	National Health Laboratory Services, Virology, Charlotte Maxeke Johannesburg hospital, Parktown, Johannesburg, Gauteng	CERI, Centre for Epidemic Response and Innvoation, Stellenbosch University and KRISP, KZN Research Innovation and Sequencing Platform, UKZN.	2021-11-25
EPI_ISL_6699771	2021-11-22	BA.1	National Health Laboratory Services, Virology, Charlotte Maxeke Johannesburg hospital, Parktown, Johannesburg, Gauteng	CERI, Centre for Epidemic Response and Innvoation, Stellenbosch University and KRISP, KZN Research Innovation and Sequencing Platform, UKZN.	2021-11-25
EPI_ISL_6704863	2021-11-19	BA.1	LANCET LABORATORY	National Institute for Communicable Diseases of the National Health Laboratory Service	2021-11-25
EPI_ISL_6704864	2021-11-20	BA.1	LANCET LABORATORY	National Institute for Communicable Diseases of the National Health Laboratory Service	2021-11-25
EPI_ISL_6704865	2021-11-19	BA.1	LANCET LABORATORY	National Institute for Communicable Diseases of the National Health Laboratory Service	2021-11-25
EPI_ISL_6704866	2021-11-19	BA.1	LANCET LABORATORY	National Institute for Communicable Diseases of the National Health Laboratory Service	2021-11-25
EPI_ISL_6704867	2021-11-20	BA.1	LANCET LABORATORY	National Institute for Communicable Diseases of the National Health Laboratory Service	2021-11-25
EPI_ISL_6704868	2021-11-20	BA.1	LANCET LABORATORY	National Institute for Communicable Diseases of the National Health Laboratory Service	2021-11-25
EPI_ISL_6704869	2021-11-20	BA.1	LANCET LABORATORY	National Institute for Communicable Diseases of the National Health Laboratory Service	2021-11-25
EPI_ISL_6704870	2021-11-20	BA.1	LANCET LABORATORY	National Institute for Communicable Diseases of the National Health Laboratory Service	2021-11-25
EPI_ISL_6704871	2021-11-20	BA.1	LANCET LABORATORY	National Institute for Communicable Diseases of the National Health Laboratory Service	2021-11-25
EPI_ISL_6704872	2021-11-20	BA.1	LANCET LABORATORY	National Institute for Communicable Diseases of the National Health Laboratory Service	2021-11-25
EPI_ISL_6704873	2021-11-20	BA.1	LANCET LABORATORY	National Institute for Communicable Diseases of the National Health Laboratory Service	2021-11-25
EPI_ISL_6704874	2021-11-20	BA.1	LANCET LABORATORY	National Institute for Communicable Diseases of the National Health Laboratory Service	2021-11-25
EPI_ISL_6704875	2021-11-20	BA.1	LANCET LABORATORY	National Institute for Communicable Diseases of the National Health Laboratory Service	2021-11-25
EPI_ISL_6704876	2021-11-20	BA.1	LANCET LABORATORY	National Institute for Communicable Diseases of the National Health Laboratory Service	2021-11-25
EPI_ISL_6782043	2021-11-15	BA.1	National Health Laboratory Services, Virology, Charlotte Maxeke Johannesburg hospital, Parktown, Johannesburg, Gauteng	CERI, Centre for Epidemic Response and Innvoation, Stellenbosch University and KRISP, KZN Research Innovation and Sequencing Platform, UKZN.	2021-11-26
EPI_ISL_6782048	2021-11-18	C.1.2	National Health Laboratory Services, Virology, Charlotte Maxeke Johannesburg hospital, Parktown, Johannesburg, Gauteng	CERI, Centre for Epidemic Response and Innvoation, Stellenbosch University and KRISP, KZN Research Innovation and Sequencing Platform, UKZN.	2021-11-26
EPI_ISL_6782055	2021-11-18	BA.1	National Health Laboratory Services, Virology, Charlotte Maxeke Johannesburg hospital, Parktown, Johannesburg, Gauteng	CERI, Centre for Epidemic Response and Innvoation, Stellenbosch University and KRISP, KZN Research Innovation and Sequencing Platform, UKZN.	2021-11-26
EPI_ISL_6782056	2021-11-18	BA.1	National Health Laboratory Services, Virology, Charlotte Maxeke Johannesburg hospital, Parktown, Johannesburg, Gauteng	CERI, Centre for Epidemic Response and Innvoation, Stellenbosch University and KRISP, KZN Research Innovation and Sequencing Platform, UKZN.	2021-11-26
EPI_ISL_6782066	2021-11-17	AY.45	National Health Laboratory Services, Virology, Charlotte Maxeke Johannesburg hospital, Parktown, Johannesburg, Gauteng	CERI, Centre for Epidemic Response and Innvoation, Stellenbosch University and KRISP, KZN Research Innovation and Sequencing Platform, UKZN.	2021-11-26
EPI_ISL_6782071	2021-11-19	BA.1	National Health Laboratory Services, Virology, Charlotte Maxeke Johannesburg hospital, Parktown, Johannesburg, Gauteng	CERI, Centre for Epidemic Response and Innvoation, Stellenbosch University and KRISP, KZN Research Innovation and Sequencing Platform, UKZN.	2021-11-26
EPI_ISL_6782079	2021-11-19	BA.1	National Health Laboratory Services, Virology, Charlotte Maxeke Johannesburg hospital, Parktown, Johannesburg, Gauteng	CERI, Centre for Epidemic Response and Innvoation, Stellenbosch University and KRISP, KZN Research Innovation and Sequencing Platform, UKZN.	2021-11-26
EPI_ISL_6782080	2021-11-19	BA.1	National Health Laboratory Services, Virology, Charlotte Maxeke Johannesburg hospital, Parktown, Johannesburg, Gauteng	CERI, Centre for Epidemic Response and Innvoation, Stellenbosch University and KRISP, KZN Research Innovation and Sequencing Platform, UKZN.	2021-11-26
EPI_ISL_6782084	2021-11-22	BA.1	National Health Laboratory Services, Virology, Charlotte Maxeke Johannesburg hospital, Parktown, Johannesburg, Gauteng	CERI, Centre for Epidemic Response and Innvoation, Stellenbosch University and KRISP, KZN Research Innovation and Sequencing Platform, UKZN.	2021-11-26
EPI_ISL_6782090	2021-11-19	BA.1	National Health Laboratory Services, Virology, Charlotte Maxeke Johannesburg hospital, Parktown, Johannesburg, Gauteng	CERI, Centre for Epidemic Response and Innvoation, Stellenbosch University and KRISP, KZN Research Innovation and Sequencing Platform, UKZN.	2021-11-26
EPI_ISL_6782091	2021-11-20	AY.45	National Health Laboratory Services, Virology, Charlotte Maxeke Johannesburg hospital, Parktown, Johannesburg, Gauteng	CERI, Centre for Epidemic Response and Innvoation, Stellenbosch University and KRISP, KZN Research Innovation and Sequencing Platform, UKZN.	2021-11-26
EPI_ISL_6782092	2021-11-22	BA.1	National Health Laboratory Services, Virology, Charlotte Maxeke Johannesburg hospital, Parktown, Johannesburg, Gauteng	CERI, Centre for Epidemic Response and Innvoation, Stellenbosch University and KRISP, KZN Research Innovation and Sequencing Platform, UKZN.	2021-11-26
EPI_ISL_6795188	2021-11-12	BA.1	National Health Laboratory Services, Virology	CERI, Centre for Epidemic Response and Innvoation, Stellenbosch University and KRISP, KZN Research Innovation and Sequencing Platform, UKZN.	2021-11-27
EPI_ISL_6795189	2021-11-12	BA.1	National Health Laboratory Services, Virology	CERI, Centre for Epidemic Response and Innvoation, Stellenbosch University and KRISP, KZN Research Innovation and Sequencing Platform, UKZN.	2021-11-27
EPI_ISL_6795190	2021-11-12	BA.1	National Health Laboratory Services, Virology	CERI, Centre for Epidemic Response and Innvoation, Stellenbosch University and KRISP, KZN Research Innovation and Sequencing Platform, UKZN.	2021-11-27
EPI_ISL_6795191	2021-11-11	BA.1	National Health Laboratory Services, Virology	CERI, Centre for Epidemic Response and Innvoation, Stellenbosch University and KRISP, KZN Research Innovation and Sequencing Platform, UKZN.	2021-11-27
EPI_ISL_6795192	2021-11-09	BA.1	National Health Laboratory Services, Virology	CERI, Centre for Epidemic Response and Innvoation, Stellenbosch University and KRISP, KZN Research Innovation and Sequencing Platform, UKZN.	2021-11-27
EPI_ISL_6795193	2021-11-12	BA.1	National Health Laboratory Services, Virology	CERI, Centre for Epidemic Response and Innvoation, Stellenbosch University and KRISP, KZN Research Innovation and Sequencing Platform, UKZN.	2021-11-27
EPI_ISL_6795194	2021-11-12	None	National Health Laboratory Services, Virology	CERI, Centre for Epidemic Response and Innvoation, Stellenbosch University and KRISP, KZN Research Innovation and Sequencing Platform, UKZN.	2021-11-27
EPI_ISL_6795833	2021-11-17	BA.1	ZARV/NHLS,ﾂDepartment Medical Virology,ﾂUniversity of Pretoria	CERI, Centre for Epidemic Response and Innvoation, Stellenbosch University and KRISP, KZN Research Innovation and Sequencing Platform, UKZN.	2021-11-27
EPI_ISL_6795834	2021-11-17	BA.2	ZARV/NHLS,ﾂDepartment Medical Virology,ﾂUniversity of Pretoria	CERI, Centre for Epidemic Response and Innvoation, Stellenbosch University and KRISP, KZN Research Innovation and Sequencing Platform, UKZN.	2021-11-27
EPI_ISL_6795835	2021-11-17	BA.1	ZARV/NHLS,ﾂDepartment Medical Virology,ﾂUniversity of Pretoria	CERI, Centre for Epidemic Response and Innvoation, Stellenbosch University and KRISP, KZN Research Innovation and Sequencing Platform, UKZN.	2021-11-27
EPI_ISL_6795836	2021-11-17	BA.1	ZARV/NHLS,ﾂDepartment Medical Virology,ﾂUniversity of Pretoria	CERI, Centre for Epidemic Response and Innvoation, Stellenbosch University and KRISP, KZN Research Innovation and Sequencing Platform, UKZN.	2021-11-27
EPI_ISL_6795837	2021-11-16	BA.1	ZARV/NHLS,ﾂDepartment Medical Virology,ﾂUniversity of Pretoria	CERI, Centre for Epidemic Response and Innvoation, Stellenbosch University and KRISP, KZN Research Innovation and Sequencing Platform, UKZN.	2021-11-27
EPI_ISL_6795838	2021-11-16	BA.1	ZARV/NHLS,ﾂDepartment Medical Virology,ﾂUniversity of Pretoria	CERI, Centre for Epidemic Response and Innvoation, Stellenbosch University and KRISP, KZN Research Innovation and Sequencing Platform, UKZN.	2021-11-27
EPI_ISL_6795839	2021-11-16	BA.1	ZARV/NHLS,ﾂDepartment Medical Virology,ﾂUniversity of Pretoria	CERI, Centre for Epidemic Response and Innvoation, Stellenbosch University and KRISP, KZN Research Innovation and Sequencing Platform, UKZN.	2021-11-27
EPI_ISL_6795840	2021-11-16	BA.1	ZARV/NHLS,ﾂDepartment Medical Virology,ﾂUniversity of Pretoria	CERI, Centre for Epidemic Response and Innvoation, Stellenbosch University and KRISP, KZN Research Innovation and Sequencing Platform, UKZN.	2021-11-27
EPI_ISL_6795841	2021-11-16	BA.1	ZARV/NHLS,ﾂDepartment Medical Virology,ﾂUniversity of Pretoria	CERI, Centre for Epidemic Response and Innvoation, Stellenbosch University and KRISP, KZN Research Innovation and Sequencing Platform, UKZN.	2021-11-27
EPI_ISL_6795842	2021-11-16	BA.1	ZARV/NHLS,ﾂDepartment Medical Virology,ﾂUniversity of Pretoria	CERI, Centre for Epidemic Response and Innvoation, Stellenbosch University and KRISP, KZN Research Innovation and Sequencing Platform, UKZN.	2021-11-27
EPI_ISL_6795843	2021-11-16	AY.45	ZARV/NHLS,ﾂDepartment Medical Virology,ﾂUniversity of Pretoria	CERI, Centre for Epidemic Response and Innvoation, Stellenbosch University and KRISP, KZN Research Innovation and Sequencing Platform, UKZN.	2021-11-27
EPI_ISL_6795844	2021-11-16	BA.1	ZARV/NHLS,ﾂDepartment Medical Virology,ﾂUniversity of Pretoria	CERI, Centre for Epidemic Response and Innvoation, Stellenbosch University and KRISP, KZN Research Innovation and Sequencing Platform, UKZN.	2021-11-27
EPI_ISL_6795845	2021-11-16	BA.1	ZARV/NHLS,ﾂDepartment Medical Virology,ﾂUniversity of Pretoria	CERI, Centre for Epidemic Response and Innvoation, Stellenbosch University and KRISP, KZN Research Innovation and Sequencing Platform, UKZN.	2021-11-27
EPI_ISL_6795846	2021-11-15	BA.1	ZARV/NHLS,ﾂDepartment Medical Virology,ﾂUniversity of Pretoria	CERI, Centre for Epidemic Response and Innvoation, Stellenbosch University and KRISP, KZN Research Innovation and Sequencing Platform, UKZN.	2021-11-27
EPI_ISL_6795847	2021-11-15	BA.1	ZARV/NHLS,ﾂDepartment Medical Virology,ﾂUniversity of Pretoria	CERI, Centre for Epidemic Response and Innvoation, Stellenbosch University and KRISP, KZN Research Innovation and Sequencing Platform, UKZN.	2021-11-27
EPI_ISL_6795848	2021-11-15	BA.1	ZARV/NHLS,ﾂDepartment Medical Virology,ﾂUniversity of Pretoria	CERI, Centre for Epidemic Response and Innvoation, Stellenbosch University and KRISP, KZN Research Innovation and Sequencing Platform, UKZN.	2021-11-27
EPI_ISL_6795849	2021-11-15	BA.1	ZARV/NHLS,ﾂDepartment Medical Virology,ﾂUniversity of Pretoria	CERI, Centre for Epidemic Response and Innvoation, Stellenbosch University and KRISP, KZN Research Innovation and Sequencing Platform, UKZN.	2021-11-27
EPI_ISL_6795850	2021-11-13	BA.1	ZARV/NHLS,ﾂDepartment Medical Virology,ﾂUniversity of Pretoria	CERI, Centre for Epidemic Response and Innvoation, Stellenbosch University and KRISP, KZN Research Innovation and Sequencing Platform, UKZN.	2021-11-27
EPI_ISL_6810481	2021-11-17	AY.38	National Health Laboratory Services, Virology, Charlotte Maxeke Johannesburg hospital, Parktown, Johannesburg, Gauteng	CERI, Centre for Epidemic Response and Innvoation, Stellenbosch University and KRISP, KZN Research Innovation and Sequencing Platform, UKZN.	2021-11-27
EPI_ISL_6810482	2021-11-17	BA.1	National Health Laboratory Services, Virology, Charlotte Maxeke Johannesburg hospital, Parktown, Johannesburg, Gauteng	CERI, Centre for Epidemic Response and Innvoation, Stellenbosch University and KRISP, KZN Research Innovation and Sequencing Platform, UKZN.	2021-11-27
EPI_ISL_6810483	2021-11-16	BA.1	National Health Laboratory Services, Virology, Charlotte Maxeke Johannesburg hospital, Parktown, Johannesburg, Gauteng	CERI, Centre for Epidemic Response and Innvoation, Stellenbosch University and KRISP, KZN Research Innovation and Sequencing Platform, UKZN.	2021-11-27
EPI_ISL_6810484	2021-11-19	BA.1	National Health Laboratory Services, Virology, Charlotte Maxeke Johannesburg hospital, Parktown, Johannesburg, Gauteng	CERI, Centre for Epidemic Response and Innvoation, Stellenbosch University and KRISP, KZN Research Innovation and Sequencing Platform, UKZN.	2021-11-27
EPI_ISL_6810485	2021-11-22	BA.1	National Health Laboratory Services, Virology, Charlotte Maxeke Johannesburg hospital, Parktown, Johannesburg, Gauteng	CERI, Centre for Epidemic Response and Innvoation, Stellenbosch University and KRISP, KZN Research Innovation and Sequencing Platform, UKZN.	2021-11-27
EPI_ISL_6810486	2021-11-19	BA.1	National Health Laboratory Services, Virology, Charlotte Maxeke Johannesburg hospital, Parktown, Johannesburg, Gauteng	CERI, Centre for Epidemic Response and Innvoation, Stellenbosch University and KRISP, KZN Research Innovation and Sequencing Platform, UKZN.	2021-11-27
EPI_ISL_6810487	2021-11-22	BA.1	National Health Laboratory Services, Virology, Charlotte Maxeke Johannesburg hospital, Parktown, Johannesburg, Gauteng	CERI, Centre for Epidemic Response and Innvoation, Stellenbosch University and KRISP, KZN Research Innovation and Sequencing Platform, UKZN.	2021-11-27
EPI_ISL_6825389	2021-11-17	BA.1	ZARV/NHLS,ﾂDepartment Medical Virology,ﾂUniversity of Pretoria	CERI, Centre for Epidemic Response and Innvoation, Stellenbosch University and KRISP, KZN Research Innovation and Sequencing Platform, UKZN.	2021-11-28
EPI_ISL_6825390	2021-11-17	BA.1	ZARV/NHLS,ﾂDepartment Medical Virology,ﾂUniversity of Pretoria	CERI, Centre for Epidemic Response and Innvoation, Stellenbosch University and KRISP, KZN Research Innovation and Sequencing Platform, UKZN.	2021-11-28
EPI_ISL_6825391	2021-11-16	BA.1	ZARV/NHLS,ﾂDepartment Medical Virology,ﾂUniversity of Pretoria	CERI, Centre for Epidemic Response and Innvoation, Stellenbosch University and KRISP, KZN Research Innovation and Sequencing Platform, UKZN.	2021-11-28
EPI_ISL_6825392	2021-11-16	BA.1	ZARV/NHLS,ﾂDepartment Medical Virology,ﾂUniversity of Pretoria	CERI, Centre for Epidemic Response and Innvoation, Stellenbosch University and KRISP, KZN Research Innovation and Sequencing Platform, UKZN.	2021-11-28
EPI_ISL_6825393	2021-11-16	BA.1	ZARV/NHLS,ﾂDepartment Medical Virology,ﾂUniversity of Pretoria	CERI, Centre for Epidemic Response and Innvoation, Stellenbosch University and KRISP, KZN Research Innovation and Sequencing Platform, UKZN.	2021-11-28
EPI_ISL_6825394	2021-11-16	BA.1	ZARV/NHLS,ﾂDepartment Medical Virology,ﾂUniversity of Pretoria	CERI, Centre for Epidemic Response and Innvoation, Stellenbosch University and KRISP, KZN Research Innovation and Sequencing Platform, UKZN.	2021-11-28
EPI_ISL_6825395	2021-11-16	BA.1	ZARV/NHLS,ﾂDepartment Medical Virology,ﾂUniversity of Pretoria	CERI, Centre for Epidemic Response and Innvoation, Stellenbosch University and KRISP, KZN Research Innovation and Sequencing Platform, UKZN.	2021-11-28
EPI_ISL_6825396	2021-11-16	BA.1	ZARV/NHLS,ﾂDepartment Medical Virology,ﾂUniversity of Pretoria	CERI, Centre for Epidemic Response and Innvoation, Stellenbosch University and KRISP, KZN Research Innovation and Sequencing Platform, UKZN.	2021-11-28
EPI_ISL_6825397	2021-11-16	BA.1	ZARV/NHLS,ﾂDepartment Medical Virology,ﾂUniversity of Pretoria	CERI, Centre for Epidemic Response and Innvoation, Stellenbosch University and KRISP, KZN Research Innovation and Sequencing Platform, UKZN.	2021-11-28
EPI_ISL_6825398	2021-11-14	BA.1	ZARV/NHLS,ﾂDepartment Medical Virology,ﾂUniversity of Pretoria	CERI, Centre for Epidemic Response and Innvoation, Stellenbosch University and KRISP, KZN Research Innovation and Sequencing Platform, UKZN.	2021-11-28
EPI_ISL_6886555	2021-11-02	AY.32	National Institute for Communicable Diseases of the National Health Laboratory Service	National Institute for Communicable Diseases of the National Health Laboratory Service	2021-11-30
EPI_ISL_6886558	2021-11-15	AY.45	National Institute for Communicable Diseases of the National Health Laboratory Service	National Institute for Communicable Diseases of the National Health Laboratory Service	2021-11-30
EPI_ISL_6900028	2021-10-22	B.1.351	HELEN JOSEPH LABORATORY	National Institute for Communicable Diseases of the National Health Laboratory Service	2021-11-30
EPI_ISL_6900030	2021-10-03	B.1.351	AMPATH	National Institute for Communicable Diseases of the National Health Laboratory Service	2021-11-30
EPI_ISL_6900031	2021-10-04	B.1.351	AMPATH	National Institute for Communicable Diseases of the National Health Laboratory Service	2021-11-30
EPI_ISL_6900033	2021-10-04	B.1.351	AMPATH	National Institute for Communicable Diseases of the National Health Laboratory Service	2021-11-30
EPI_ISL_6900037	2021-10-04	B.1.351	AMPATH	National Institute for Communicable Diseases of the National Health Laboratory Service	2021-11-30
EPI_ISL_6900042	2021-10-04	B.1.351	AMPATH	National Institute for Communicable Diseases of the National Health Laboratory Service	2021-11-30
EPI_ISL_6900044	2021-10-04	B.1.351	AMPATH	National Institute for Communicable Diseases of the National Health Laboratory Service	2021-11-30
EPI_ISL_6900050	2021-10-04	B.1.351	AMPATH	National Institute for Communicable Diseases of the National Health Laboratory Service	2021-11-30
EPI_ISL_6900051	2021-10-04	B.1.351	AMPATH	National Institute for Communicable Diseases of the National Health Laboratory Service	2021-11-30
EPI_ISL_6900052	2021-10-05	B.1.351	AMPATH	National Institute for Communicable Diseases of the National Health Laboratory Service	2021-11-30
EPI_ISL_6900055	2021-10-05	B.1.351	AMPATH	National Institute for Communicable Diseases of the National Health Laboratory Service	2021-11-30
EPI_ISL_6900058	2021-10-05	B.1.351	AMPATH	National Institute for Communicable Diseases of the National Health Laboratory Service	2021-11-30
EPI_ISL_6900059	2021-10-05	B.1.351	AMPATH	National Institute for Communicable Diseases of the National Health Laboratory Service	2021-11-30
EPI_ISL_6900061	2021-10-07	B.1.351	AMPATH	National Institute for Communicable Diseases of the National Health Laboratory Service	2021-11-30
EPI_ISL_6900062	2021-10-06	B.1.351	AMPATH	National Institute for Communicable Diseases of the National Health Laboratory Service	2021-11-30
EPI_ISL_6900063	2021-10-06	B.1.351	AMPATH	National Institute for Communicable Diseases of the National Health Laboratory Service	2021-11-30
EPI_ISL_6900064	2021-10-06	B.1.351	AMPATH	National Institute for Communicable Diseases of the National Health Laboratory Service	2021-11-30
EPI_ISL_6900065	2021-10-06	B.1.351	AMPATH	National Institute for Communicable Diseases of the National Health Laboratory Service	2021-11-30
EPI_ISL_6900072	2021-10-07	B.1.351	AMPATH	National Institute for Communicable Diseases of the National Health Laboratory Service	2021-11-30
EPI_ISL_6900076	2021-10-09	B.1.351	AMPATH	National Institute for Communicable Diseases of the National Health Laboratory Service	2021-11-30
EPI_ISL_6900078	2021-10-08	B.1.351	AMPATH	National Institute for Communicable Diseases of the National Health Laboratory Service	2021-11-30
EPI_ISL_6900079	2021-10-08	B.1.351	AMPATH	National Institute for Communicable Diseases of the National Health Laboratory Service	2021-11-30
EPI_ISL_6900080	2021-10-08	B.1.351	AMPATH	National Institute for Communicable Diseases of the National Health Laboratory Service	2021-11-30
EPI_ISL_6900081	2021-10-08	B.1.351	AMPATH	National Institute for Communicable Diseases of the National Health Laboratory Service	2021-11-30
EPI_ISL_6900082	2021-10-08	AY.116	AMPATH	National Institute for Communicable Diseases of the National Health Laboratory Service	2021-11-30
EPI_ISL_6900083	2021-10-08	AY.45	AMPATH	National Institute for Communicable Diseases of the National Health Laboratory Service	2021-11-30
EPI_ISL_6900084	2021-10-08	AY.38	AMPATH	National Institute for Communicable Diseases of the National Health Laboratory Service	2021-11-30
EPI_ISL_6900087	2021-10-08	AY.45	AMPATH	National Institute for Communicable Diseases of the National Health Laboratory Service	2021-11-30
EPI_ISL_6900095	2021-11-03	AY.75	HELEN JOSEPH LABORATORY	National Institute for Communicable Diseases of the National Health Laboratory Service	2021-11-30
EPI_ISL_6900134	2021-10-11	C.1.2	TAMBO MEMORIAL LABORATORY	National Institute for Communicable Diseases of the National Health Laboratory Service	2021-11-30
EPI_ISL_6900135	2021-10-05	AY.45	TAMBO MEMORIAL LABORATORY	National Institute for Communicable Diseases of the National Health Laboratory Service	2021-11-30
EPI_ISL_6900139	2021-11-10	BA.1	HELEN JOSEPH LABORATORY	National Institute for Communicable Diseases of the National Health Laboratory Service	2021-11-30
EPI_ISL_6900140	2021-11-09	AY.45	HELEN JOSEPH LABORATORY	National Institute for Communicable Diseases of the National Health Laboratory Service	2021-11-30
EPI_ISL_6900141	2021-11-11	BA.1	HELEN JOSEPH LABORATORY	National Institute for Communicable Diseases of the National Health Laboratory Service	2021-11-30
EPI_ISL_6900142	2021-11-10	BA.1	HELEN JOSEPH LABORATORY	National Institute for Communicable Diseases of the National Health Laboratory Service	2021-11-30
EPI_ISL_6900143	2021-11-09	BA.1	HELEN JOSEPH LABORATORY	National Institute for Communicable Diseases of the National Health Laboratory Service	2021-11-30
EPI_ISL_6900144	2021-09-21	C.1.2	KOPANONG LABORATORY	National Institute for Communicable Diseases of the National Health Laboratory Service	2021-11-30
EPI_ISL_6900145	2021-10-13	AY.45	KOPANONG LABORATORY	National Institute for Communicable Diseases of the National Health Laboratory Service	2021-11-30
EPI_ISL_6900146	2021-09-22	AY.45	KOPANONG LABORATORY	National Institute for Communicable Diseases of the National Health Laboratory Service	2021-11-30
EPI_ISL_6900147	2021-09-30	AY.46	KOPANONG LABORATORY	National Institute for Communicable Diseases of the National Health Laboratory Service	2021-11-30
EPI_ISL_6900148	2021-09-20	AY.45	KOPANONG LABORATORY	National Institute for Communicable Diseases of the National Health Laboratory Service	2021-11-30
EPI_ISL_6900149	2021-09-24	AY.45	KOPANONG LABORATORY	National Institute for Communicable Diseases of the National Health Laboratory Service	2021-11-30
EPI_ISL_6906375	2021-10-01	AY.45	TAMBO MEMORIAL LABORATORY	National Institute for Communicable Diseases of the National Health Laboratory Service	2021-11-30
EPI_ISL_6906383	2021-10-07	AY.19	TAMBO MEMORIAL LABORATORY	National Institute for Communicable Diseases of the National Health Laboratory Service	2021-11-30
EPI_ISL_6906407	2021-11-04	C.1.2	HELEN JOSEPH LABORATORY	National Institute for Communicable Diseases of the National Health Laboratory Service	2021-11-30
